# Supplementary material for: Separation of small metabolites and lipids in spectra from biopsies by diffusion-weighted HR-MAS NMR: a feasibility study
Source: Royal Society of Chemistry journal article supplement (doi:10.1039/c4an01663g), 2014-10-06
Supplement: c4an01663g1.pdf [file c4an01663g1.pdf]

## Electronic Supplementary Information

| #  | Reason for excluding the region |
|----|---------------------------------|
| 1  | Lipid & Noise                   |
| 2  | Lipid                           |
| 3  | Lidocaine contamination         |
| 4  | Lipid                           |
| 5  | Pure noise                      |
| 6  | Lipid                           |
| 7  | Lidocaine contamination & Lipid |
| 8  | Lipid                           |
| 9  | Lipid                           |
| 10 | Lidocaine contamination         |
| 11 | Lipid                           |
| 12 | Water residue                   |
| 13 | Lipid                           |
| 14 | Pure noise                      |
| 15 | Pure noise                      |
| 16 | Lidocaine contamination & Noise |
| 17 | Pure noise                      |

**Table S1:** Excluded regions from figure S1, with the reasons for exclusion

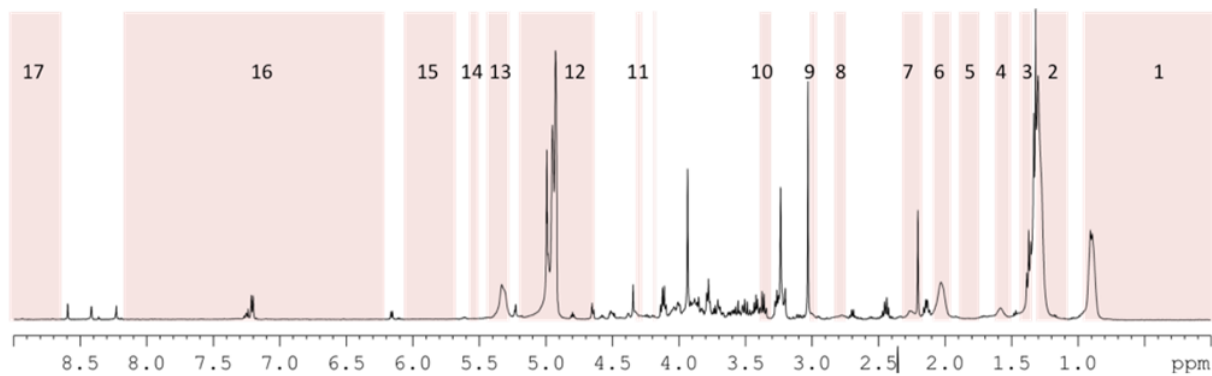

**Fig. S1:** Muscle spectrum example, with the excluded regions in color, labelled according to Table S1.
